# Supplementary material for: Factors Affecting Weigh Tape Reading in the Measurement of Equine Body Weight
Source: MDPI journal article supplement (doi:10.3390/ani13081330), 2023-04-13
Supplement: s1 [file s1]

## Supplementary Data

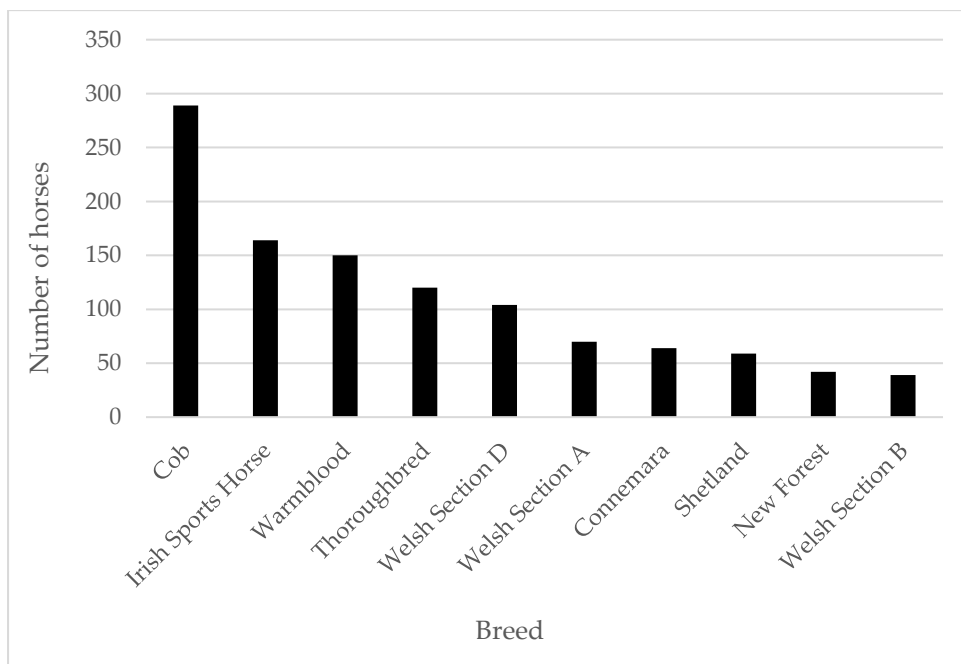

**Supplementary Figure S1.** Chart to show the 10 most frequent horse breeds represented in the data.

**Supplementary Table S1.** Details of the breeds and cross-breeds represented in the data and the number of horses within each.

| Breed or cross-breeds        | Number of horses |
|------------------------------|------------------|
| Andalusian                   | 16               |
| Andalusian x Arab            | 1                |
| Andalusian x Cob             | 1                |
| Andalusian x Unknown         | 3                |
| Anglo Arab                   | 4                |
| Anglo European               | 4                |
| Appaloosa                    | 12               |
| Arab                         | 13               |
| Arab x Appaloosa             | 1                |
| Arab x Connemara             | 1                |
| Arab x Dartmoor              | 2                |
| Arab x Trotter               | 1                |
| Arab x Unknown               | 7                |
| Arab x Warmblood             | 2                |
| Belgian Warmblood            | 11               |
| British Riding Pony          | 20               |
| Camargue x Unknown           | 1                |
| Cleveland Bay x Thoroughbred | 1                |
| Cleveland Bay x Unknown      | 1                |

|                                |     |
|--------------------------------|-----|
| Clydesdale                     | 2   |
| Clydesdale x Connemara         | 1   |
| Clydesdale x Thoroughbred      | 1   |
| Clydesdale x Unknown           | 1   |
| Cob                            | 289 |
| Cob x American Paint           | 2   |
| Cob x Appaloosa                | 3   |
| Cob x Arab                     | 1   |
| Cob x Clydesdale               | 1   |
| Cob x Dales                    | 1   |
| Cob x Irish Draught            | 1   |
| Cob x Standardbred             | 1   |
| Cob x Welsh                    | 2   |
| Connemara                      | 64  |
| Connemara x Andalusian         | 1   |
| Connemara x Cob                | 5   |
| Connemara x Irish Sports Horse | 7   |
| Connemara x New Forest         | 1   |
| Connemara x Saddlebred         | 1   |
| Connemara x Thoroughbred       | 7   |
| Connemara x Unknown            | 11  |
| Connemara x Warmblood          | 3   |
| Connemara x Welsh              | 3   |
| Connemara x Welsh Section B    | 1   |
| Dales                          | 11  |
| Dales x Cob                    | 1   |
| Dales x Irish Sports Horse     | 1   |
| Dartmoor                       | 17  |
| Dartmoor x Shetland            | 1   |
| Dartmoor x Unknown             | 1   |
| Driving Pony (Unknown breed)   | 2   |
| Exmoor                         | 6   |
| Fell                           | 10  |
| Fell x Dales                   | 1   |
| Fell x Unknown                 | 2   |
| Fell x Welsh Section D         | 1   |
| Fjord                          | 2   |
| Friesian                       | 4   |
| Friesian x Cob                 | 2   |
| Friesian x Trotter             | 1   |
| Friesian x Unknown             | 1   |
| Hackney                        | 1   |
| Hackney x Thoroughbred         | 1   |
| Hackney x Welsh Section D      | 1   |
| Haflinger                      | 14  |
| Haflinger x Unknown            | 1   |

|                                   |     |
|-----------------------------------|-----|
| Hanoverian                        | 8   |
| Hanoverian x Cob                  | 1   |
| Hanoverian x Irish Sports Horse   | 2   |
| Hanoverian x Thoroughbred         | 3   |
| Hanoverian x Unknown              | 3   |
| Hanoverian x Warmblood            | 1   |
| Highland                          | 6   |
| Irish Draught                     | 17  |
| Irish Draught x Connemara         | 6   |
| Irish Draught x Unknown           | 15  |
| Irish Draught x Warmblood         | 5   |
| Irish Sports Horse                | 164 |
| Irish Sports Horse x Cob          | 7   |
| Knabstrupper                      | 3   |
| Lipizzaner x Cob                  | 2   |
| Lipizzaner x Friesian             | 1   |
| Lipizzaner x Unknown              | 1   |
| Lusitano                          | 5   |
| Morgan x Cob                      | 1   |
| Morgan x Connemara                | 1   |
| Native (Unknown)                  | 10  |
| New Forest                        | 42  |
| New Forest x Cob                  | 2   |
| New Forest x Thoroughbred         | 3   |
| New Forest x Unknown              | 8   |
| New Forest x Warmblood            | 1   |
| Oldenburg                         | 3   |
| Oldenburg x Thoroughbred          | 1   |
| Polo Pony                         | 3   |
| Pony (Unknown)                    | 7   |
| Quarter Horse                     | 3   |
| Riding Horse (Unknown)            | 5   |
| Shetland                          | 59  |
| Shetland x Fell                   | 1   |
| Shetland x New Forest             | 1   |
| Shetland x Unknown                | 1   |
| Shire x Thoroughbred              | 1   |
| Shire x Unknown                   | 2   |
| Show Pony x Cob                   | 1   |
| Sports Pony                       | 9   |
| Standardbred                      | 7   |
| Standardbred x Friesian           | 1   |
| Thoroughbred                      | 120 |
| Thoroughbred x Appaloosa          | 2   |
| Thoroughbred x Cob                | 16  |
| Thoroughbred x Irish Sports Horse | 4   |

|                                                   |     |
|---------------------------------------------------|-----|
| Thoroughbred x Unknown                            | 18  |
| Thoroughbred x Warmblood x Clydesdale             | 1   |
| Trakehner                                         | 3   |
| Trakehner x Anglo Arab                            | 1   |
| Trakehner x Cob                                   | 1   |
| Trakehner x Connemara                             | 1   |
| Trakehner x Unknown                               | 1   |
| Trotter                                           | 7   |
| Trotter x Cob                                     | 9   |
| Trotter x Unknown                                 | 2   |
| Trotter x Welsh                                   | 3   |
| Warmblood                                         | 150 |
| Warmblood x Appaloosa                             | 1   |
| Warmblood x Cob                                   | 4   |
| Warmblood x Irish Sports Horse                    | 5   |
| Warmblood x Sports Pony                           | 1   |
| Warmblood x Thoroughbred                          | 20  |
| Warmblood x Thoroughbred x Connemara              | 1   |
| Warmblood x Thoroughbred x Welsh                  | 1   |
| Warmblood x Unknown                               | 13  |
| Welsh Section A                                   | 70  |
| Welsh Section A x Cob                             | 1   |
| Welsh Section A x Irish Draught                   | 1   |
| Welsh Section A x Shetland                        | 2   |
| Welsh Section A x Unknown                         | 1   |
| Welsh Section B                                   | 39  |
| Welsh Section B x Arab                            | 3   |
| Welsh Section B x Unknown                         | 1   |
| Welsh Section C                                   | 17  |
| Welsh Section C x Cob                             | 1   |
| Welsh Section C x Unknown                         | 1   |
| Welsh Section D                                   | 104 |
| Welsh Section D x Cob                             | 2   |
| Welsh Section D x Irish Draught                   | 1   |
| Welsh Section D x Lusitano                        | 1   |
| Welsh Section D x Thoroughbred                    | 3   |
| Welsh Section D x Thoroughbred x Irish<br>Draught | 1   |
| Welsh Section D x Unknown                         | 8   |
| Welsh Section D x Warmblood                       | 1   |
| Welsh x Appaloosa                                 | 3   |
| Welsh x Arab                                      | 10  |
| Welsh x Dales                                     | 1   |
| Welsh x Fell                                      | 1   |
| Welsh x Hackney                                   | 1   |
| Welsh x Irish Draught                             | 1   |

|                      |    |
|----------------------|----|
| Welsh x Thoroughbred | 2  |
| Welsh x Unknown      | 27 |
| Welsh x Warmblood    | 1  |
| Westphalian          | 9  |

---
